# Supplementary material
Source: Springer Nature journal article supplement (https://www.springermedizin.de/resource/supplementary/12961_2014_339_MOESM1_ESM.pdf/9571076)

GHC or USD

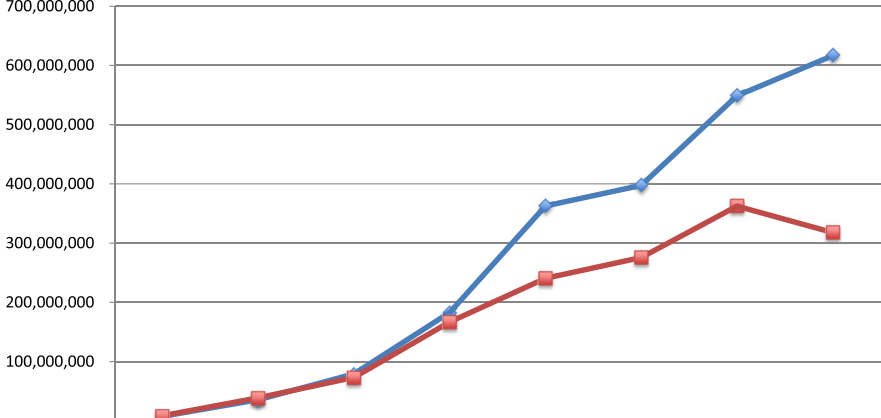

|     | 2005      | 2006      | 2007      | 2008      | 2009      | 2010      | 2011      | 2012      |
|-----|-----------|-----------|-----------|-----------|-----------|-----------|-----------|-----------|
| GHC | 7,600,000 | 35,480,00 | 79,260,00 | 183,010,0 | 362,640,0 | 397,610,0 | 548,710,0 | 616,470,0 |
| USD | 8,409,400 | 38,673,20 | 73,339,27 | 166,795,3 | 240,720,4 | 275,623,2 | 362,532,6 | 317,765,6 |

Supplement: MOESM1 [file 9571076]
